# Supplementary material
Source: PubMed Central journal article supplement (PMC5438295)
Supplement: NIHMS860838-supplement-Supplemental_Figures.pdf [file NIHMS860838-supplement-Supplemental_Figures.pdf]

Figure S1

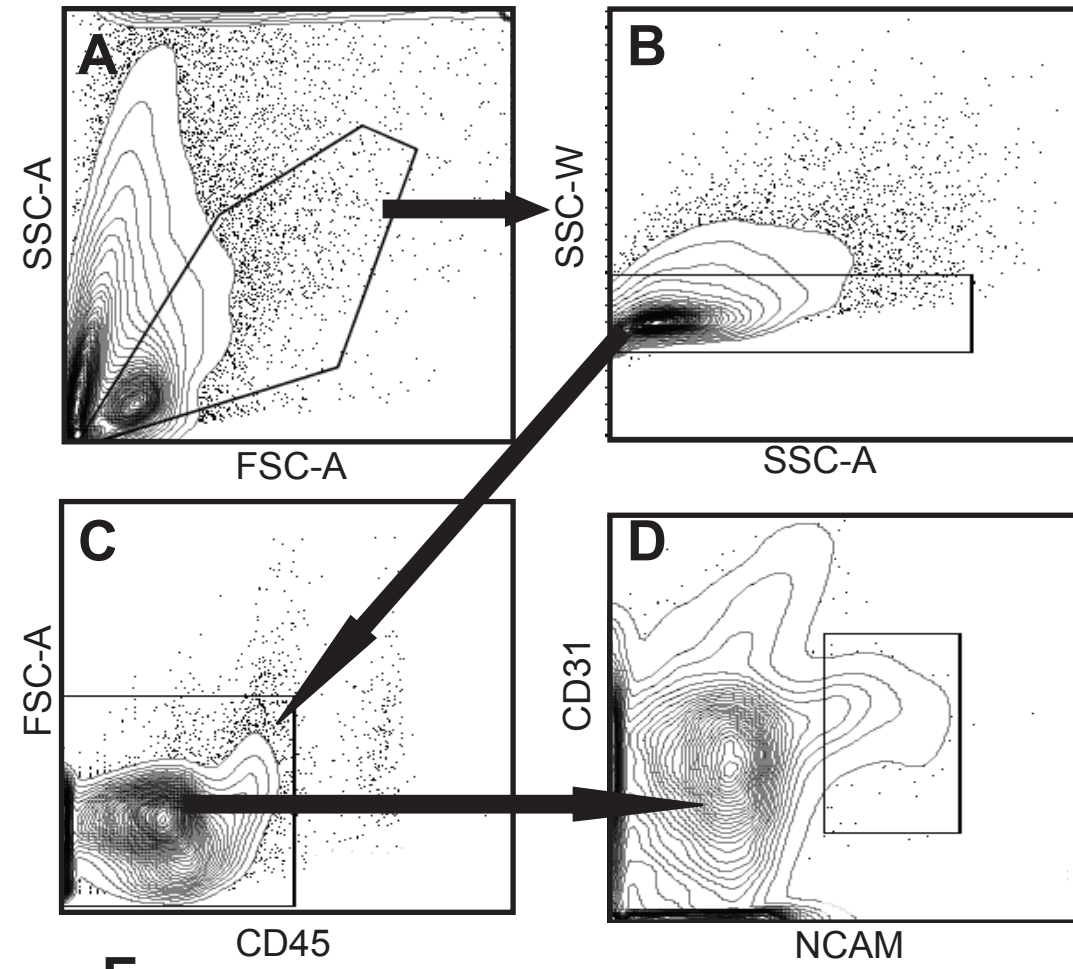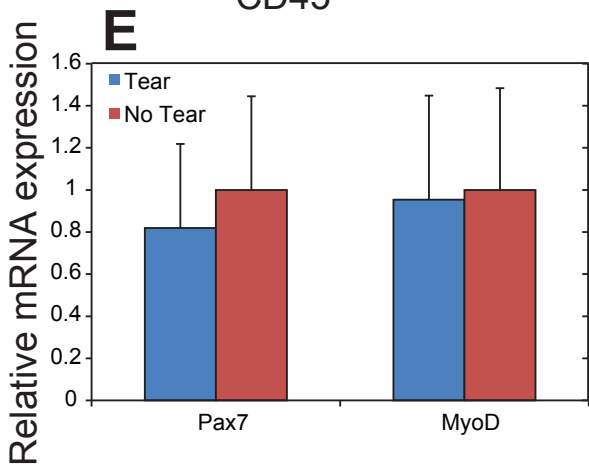

# Figure S2

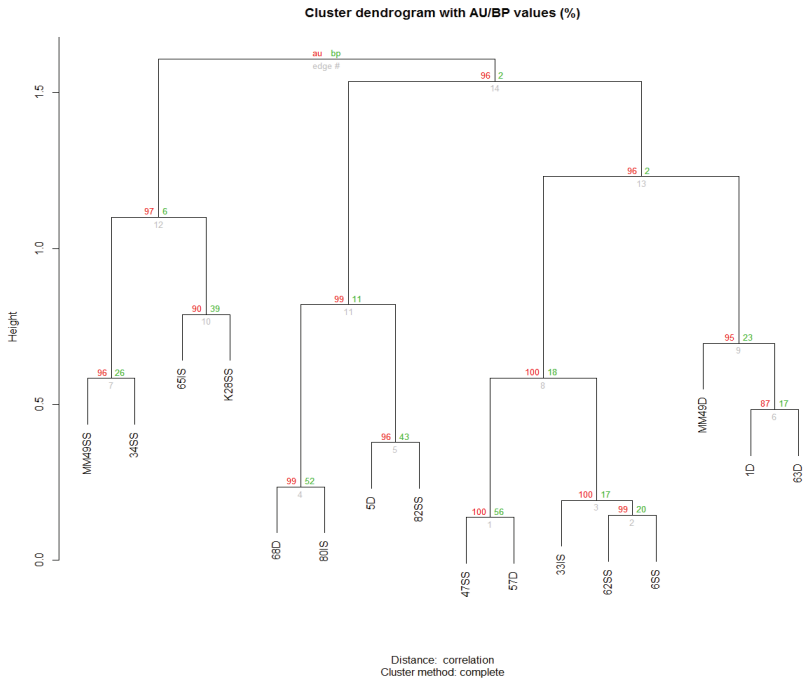

# Figure S3

## Cluster dendrogram with AU/BP values (%)

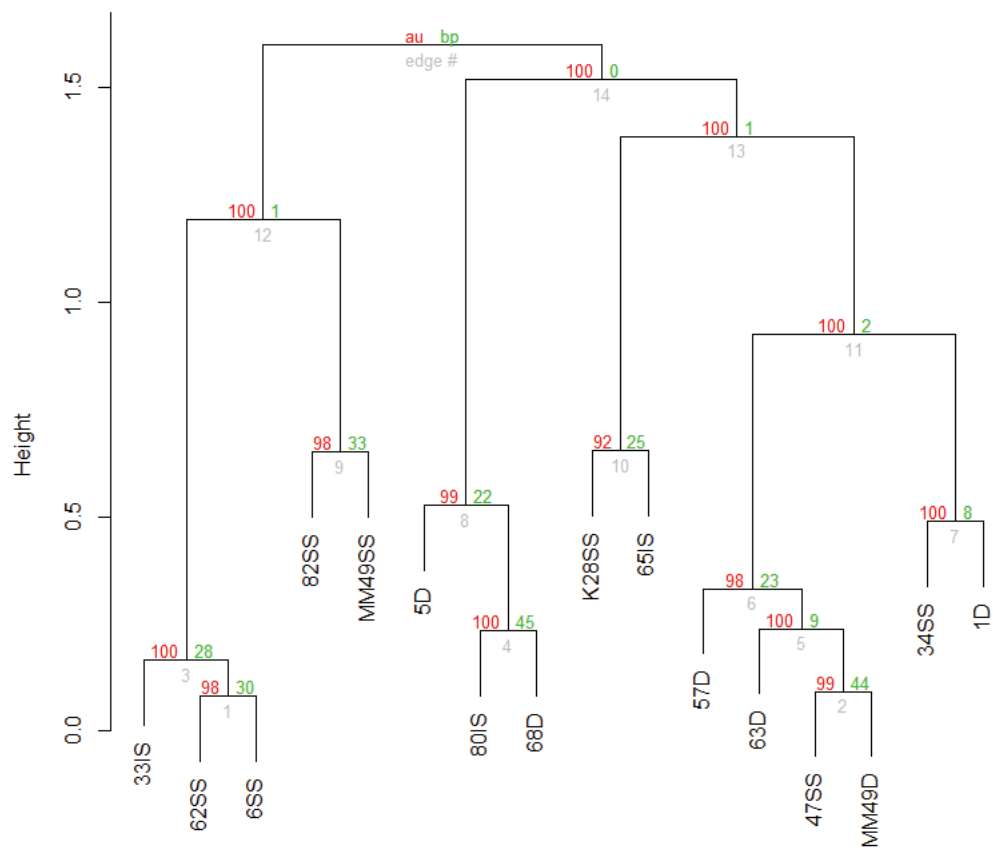

Distance: correlation  
Cluster method: complete
